# Supplementary material
Source: publisher figshare collection journal article supplement (https://acs.figshare.com/ndownloader/files/4553911)
Supplement: Supplementary file 1 [file 4553911]

#\#CIF_1.1
 
#  CIF produced by WinGX routine CIF_UPDATE
#  Created on 2008-10-04 at 00:21:31
#  Using CIFtbx version 2.6.2 16 Jun 1998
 
#  Dictionary name : cif_core.dic
#  Dictionary vers : 2.3
#  Request file    : c:\wingx\files\archive.dat
#  CIF files read  : ln246 ln246non
 
#
#     CCDC ELECTRONIC DATA DEPOSITION FORM (CIF)
#
#     This electronic data deposition form can be used:
#
#     (a) WHEN SUBMITTING A PAPER TO A JOURNAL FOR PUBLICATION or
#     (b) WHEN SUBMITTING A PRIVATE COMMUNICATION TO THE CCDC
#
#     A comprehensive archive of CIF resources is maintained by the IUCr
#     at its Chester office. This can be accessed
#     by anonymous ftp to ftp.iucr.org
#     or via the WWW at http://www.iucr.org/cif/home.html
#     If data items in this form are not available or not applicable
#     then ignore these items
#     A few items specific to CCDC input are indicated by _ccdc_
#
#     Submission and help information is provided at the end of this form
#-------------------------------------------------------------------------
#1    Global data block identification for start of deposition
 
data_global
 
#
#-------------------------------------------------------------------------
#2    Person making the deposition
#
_publ_contact_author               'Bein, Thomas'
_publ_contact_author_email          tbein@cup.uni-muenchen.de
 
#-------------------------------------------------------------------------
#3    Publication details
#
#     Provide these details if the structure has been published,
#     accepted or submitted for publication
#
#     The CCDC journal deposition number, eg. 182/357,
#     should be included only if it has been assigned by the journal
#
loop_
_publ_author_name
 
'Bein, Thomas'
 
_journal_name_full                 'private communication'
_journal_volume                    ?
_journal_page_first                ?
_journal_page_last                 ?
_journal_year                      ?
_ccdc_journal_depnumber            ?
#
#-------------------------------------------------------------------------
#4    Chemical and physical data
#
#     Note that the units for melting point are Kelvin
#     The compound_id is the identifier for the compound in the published
#       paper, eg. 4a, II, etc.
#     Provide a brief description of any significant biological activity,
#       eg. antimalarial activity
#     If the compound exhibits polymorphism provide brief details,
#       eg. monoclinic form, low-temperature phase, etc.
#     For chemdiag  leave blank - no longer necessary
 
_ccdc_compound_id                  ?
_ccdc_biological_activity          ?
_ccdc_polymorph                    ?
 
_ccdc_chemdiag_type                ?
_ccdc_chemdiag_records
;
?
;
#
#-------------------------------------------------------------------------
#5    Other data relating to the structure determination and refinement
#
#     Record the radiation type if not X-rays, eg. neutron
#     Record the temperature of the data collection (Kelvin)
#       if not room-temperature
#     Record R_squared if this is the only reliability factor given by
#       your refinement program
#     Describe briefly any disorder, eg. t-Butyl C31-33 disordered over
#       two sites with occupancies 0.6 and 0.4
#     Under ccdc_comments record any other important information
 
_ccdc_temp_data_collection          ?
_ccdc_ls_R_squared                  ?
_ccdc_disorder                      ?
_ccdc_comments
;
?
;
#-------------------------------------------------------------------------
#6    Include your "standard" CIF file here
#     It should contain the following data items:
#       unit cell parameters and volume, z value, space group symbol,
#       R-factor(s), atomic coordinates with standard deviations,
#       occupancy factors, bond lengths and bond angles
#     Other data items may be present but will not necessarily be
#       included in the Cambridge Structural Database
#
#     Do NOT include structure factors
#
#
#-------------------------------------------------------------------------
#SUBMISSION INFORMATION
#
#     For a journal send the form to the address specified by the journal
#
#     For a private communication to the CCDC send the form to the address
#       deposit@ccdc.cam.ac.uk
#
#     For up-to-date information on deposition procedures, check the website
#       http://www.ccdc.cam.ac.uk/
 
data_ln246
 
_audit_creation_date                    2008-10-04T00:21:31-00:00
_audit_creation_method                  'WinGX routine CIF_UPDATE'
 
#----------------------------------------------------------------------------#
#                   CHEMICAL INFORMATION                                     #
#----------------------------------------------------------------------------#
 
_chemical_name_systematic
;
 ?
;
_chemical_name_common                 	La(H5L) b
_chemical_formula_moiety   		La[(PO3H)2CH-C6H4-CH(PO3H)(PO3H2)]�4H2O
_chemical_formula_sum                   'C8 H19 La O16 P4'
_chemical_formula_weight                634.02
 
#----------------------------------------------------------------------------#
#                   UNIT CELL INFORMATION                                    #
#----------------------------------------------------------------------------#
 
_symmetry_cell_setting                  triclinic
_symmetry_space_group_name_H-M          P-1
loop_
    _symmetry_equiv_pos_as_xyz
'x, y, z'
'-x, -y, -z'
 
_cell_length_a                          5.49830(10)
_cell_length_b                          12.5695(3)
_cell_length_c                          14.6540(3)
_cell_angle_alpha                       106.223(2)
_cell_angle_beta                        100.6700(10)
_cell_angle_gamma                       99.5930(10)
_cell_volume                            929.67(3)
_cell_formula_units_Z                   2
_cell_measurement_temperature           200(2)
_cell_measurement_reflns_used           14772
_cell_measurement_theta_min             3.134
_cell_measurement_theta_max             27.485
 
#----------------------------------------------------------------------------#
#                   CRYSTAL INFORMATION                                      #
#----------------------------------------------------------------------------#
 
_exptl_crystal_description              rod
_exptl_crystal_colour                   colourless
_exptl_crystal_size_max                 0.07
_exptl_crystal_size_mid                 0.03
_exptl_crystal_size_min                 0.03
_exptl_crystal_density_diffrn           2.265
_exptl_crystal_density_method           'not measured'
_exptl_crystal_F_000                    624
loop_
    _exptl_crystal_face_index_h
    _exptl_crystal_face_index_k
    _exptl_crystal_face_index_l
    _exptl_crystal_face_perp_dist
0 0 1 0.01
0 0 -1 0.02
-5 2 3 0.04
5 -2 -3 0.03
0 2 -1 0.01
0 -2 1 0.02
 
_exptl_special_details
;
 ?
;
 
#----------------------------------------------------------------------------#
#                   ABSORPTION CORRECTION                                    #
#----------------------------------------------------------------------------#
 
_exptl_absorpt_coefficient_mu           2.724
_exptl_absorpt_correction_type          none
 
#----------------------------------------------------------------------------#
#                   DATA COLLECTION                                          #
#----------------------------------------------------------------------------#
 
_diffrn_ambient_temperature             200(2)
_diffrn_radiation_wavelength            0.71073
_diffrn_radiation_type                  MoK\a
_diffrn_radiation_monochromator         graphite
_diffrn_detector_area_resol_mean        9
_diffrn_orient_matrix_type
                                     'by Bruker AXS Collect from scalepack cell'
_diffrn_orient_matrix_ub_11             0.0085588
_diffrn_orient_matrix_ub_12             -0.0025145
_diffrn_orient_matrix_ub_13             0.0681061
_diffrn_orient_matrix_ub_21             0.1768604
_diffrn_orient_matrix_ub_22             -0.0118323
_diffrn_orient_matrix_ub_23             0.0055704
_diffrn_orient_matrix_ub_31             0.0695587
_diffrn_orient_matrix_ub_32             0.0843064
_diffrn_orient_matrix_ub_33             0.0265229
_diffrn_measurement_device              '95mm CCD camera on \k-goniostat'
_diffrn_measurement_device_type         KappaCCD
_diffrn_reflns_av_R_equivalents         0.027
_diffrn_reflns_av_unetI/netI            0.0397
_diffrn_reflns_number                   8093
_diffrn_reflns_limit_h_min              -7
_diffrn_reflns_limit_h_max              7
_diffrn_reflns_limit_k_min              -16
_diffrn_reflns_limit_k_max              16
_diffrn_reflns_limit_l_min              -19
_diffrn_reflns_limit_l_max              19
_diffrn_reflns_theta_min                3.31
_diffrn_reflns_theta_max                27.54
_diffrn_reflns_theta_full               27.54
_diffrn_measured_fraction_theta_full
                                        0.997
_diffrn_measured_fraction_theta_max
                                        0.997
_reflns_number_total                    4263
_reflns_number_gt                       3809
_reflns_threshold_expression            >2sigma(I)
 
#----------------------------------------------------------------------------#
#                   COMPUTER PROGRAMS USED                                   #
#----------------------------------------------------------------------------#
 
_computing_data_collection              'Collect (Bruker AXS BV, 1997-2004)'
_computing_cell_refinement
                                       'HKL Scalepack (Otwinowski & Minor 1997)'
_computing_data_reduction
                             'HKL Denzo and Scalepack (Otwinowski & Minor 1997)'
_computing_structure_refinement         'SHELXL-97 (Sheldrick, 1997)'
 
#----------------------------------------------------------------------------#
#                   REFINEMENT INFORMATION                                   #
#----------------------------------------------------------------------------#
 
_refine_special_details
;
 Refinement of F^2^ against ALL reflections.  The weighted R-factor wR and
 goodness of fit S are based on F^2^, conventional R-factors R are based
 on F, with F set to zero for negative F^2^. The threshold expression of
 F^2^ > 2sigma(F^2^) is used only for calculating R-factors(gt) etc. and is
 not relevant to the choice of reflections for refinement.  R-factors based
 on F^2^ are statistically about twice as large as those based on F, and R-
 factors based on ALL data will be even larger.
;
_refine_ls_structure_factor_coef        Fsqd
_refine_ls_matrix_type                  full
_refine_ls_weighting_scheme             calc
_refine_ls_weighting_details
         'calc w=1/[\s^2^(Fo^2^)+(0.0184P)^2^+0.5577P] where P=(Fo^2^+2Fc^2^)/3'
_atom_sites_solution_primary            direct
_atom_sites_solution_secondary          difmap
_atom_sites_solution_hydrogens          geom
_refine_ls_hydrogen_treatment           mixed
_refine_ls_extinction_method            none
_refine_ls_number_reflns                4263
_refine_ls_number_parameters            336
_refine_ls_number_restraints            1
_refine_ls_R_factor_all                 0.0301
_refine_ls_R_factor_gt                  0.0239
_refine_ls_wR_factor_ref                0.0526
_refine_ls_wR_factor_gt                 0.0504
_refine_ls_goodness_of_fit_ref          1.077
_refine_ls_restrained_S_all             1.077
_refine_ls_shift/su_max                 0.002
_refine_ls_shift/su_mean                0
_refine_diff_density_max                0.785
_refine_diff_density_min                -0.593
_refine_diff_density_rms                0.11
 
#----------------------------------------------------------------------------#
#                   ATOMIC TYPES, COORDINATES AND THERMAL PARAMETERS         #
#----------------------------------------------------------------------------#
 
loop_
    _atom_type_symbol
    _atom_type_description
    _atom_type_scat_dispersion_real
    _atom_type_scat_dispersion_imag
    _atom_type_scat_source
C C 0.0033 0.0016 'International Tables Vol C Tables 4.2.6.8 and 6.1.1.4'
H H 0 0 'International Tables Vol C Tables 4.2.6.8 and 6.1.1.4'
La La -0.2871 2.4523 'International Tables Vol C Tables 4.2.6.8 and 6.1.1.4'
O O 0.0106 0.006 'International Tables Vol C Tables 4.2.6.8 and 6.1.1.4'
P P 0.1023 0.0942 'International Tables Vol C Tables 4.2.6.8 and 6.1.1.4'
 
loop_
    _atom_site_label
    _atom_site_type_symbol
    _atom_site_fract_x
    _atom_site_fract_y
    _atom_site_fract_z
    _atom_site_U_iso_or_equiv
    _atom_site_adp_type
    _atom_site_occupancy
    _atom_site_symmetry_multiplicity
    _atom_site_calc_flag
    _atom_site_refinement_flags
    _atom_site_disorder_assembly
    _atom_site_disorder_group
La1 La 0.23137(3) 0.207162(12) 0.716565(11) 0.01144(5) Uani 1 1 d . . .
P1 P 0.66547(13) 0.48177(6) 0.86518(5) 0.01303(15) Uani 1 1 d . . .
P2 P -0.26109(13) 0.38696(6) 0.66152(5) 0.01147(14) Uani 1 1 d . . .
P3 P 0.61582(13) -0.00961(6) 0.64741(5) 0.01309(15) Uani 1 1 d . . .
P4 P 0.54529(14) 0.02671(6) 0.85181(5) 0.01484(15) Uani 1 1 d . . .
O1 O 0.5948(4) 0.35469(16) 0.84406(13) 0.0171(4) Uani 1 1 d . . .
O2 O 0.8565(4) 0.54756(16) 0.96260(13) 0.0187(4) Uani 1 1 d . . .
O3 O 0.4179(4) 0.52701(19) 0.86456(15) 0.0197(4) Uani 1 1 d . . .
O4 O -0.2068(4) 0.43545(18) 0.57748(15) 0.0187(4) Uani 1 1 d . . .
O5 O -0.5401(3) 0.32857(15) 0.63520(13) 0.0138(4) Uani 1 1 d . . .
O6 O -0.0801(4) 0.31460(16) 0.68235(13) 0.0162(4) Uani 1 1 d . . .
O7 O 0.4653(4) 0.07692(17) 0.63284(16) 0.0242(5) Uani 1 1 d . . .
O8 O 0.8973(4) 0.03481(18) 0.68058(15) 0.0234(5) Uani 1 1 d . . .
O9 O 0.5398(4) -0.11362(18) 0.54987(15) 0.0243(5) Uani 1 1 d D . .
O10 O 0.4250(4) 0.12262(16) 0.84051(14) 0.0189(4) Uani 1 1 d . . .
O11 O 0.8359(4) 0.07145(19) 0.90134(15) 0.0219(5) Uani 1 1 d . . .
O12 O 0.4385(4) -0.04209(16) 0.91156(14) 0.0204(4) Uani 1 1 d . . .
O13 O 0.0152(7) 0.1258(2) 0.52520(18) 0.0311(6) Uani 1 1 d . . .
O14 O 1.0289(4) 0.26538(17) 0.86840(15) 0.0174(4) Uani 1 1 d . . .
O15 O 0.1264(4) 0.3575(2) 0.48671(18) 0.0250(5) Uani 1 1 d . . .
O16 O 0.5118(6) 0.7413(2) 0.9600(2) 0.0404(7) Uani 1 1 d . . .
C1 C -0.1974(5) 0.5130(2) 0.76830(19) 0.0133(5) Uani 1 1 d . . .
C2 C -0.2664(5) 0.6185(2) 0.74959(19) 0.0132(5) Uani 1 1 d . . .
C3 C -0.0968(6) 0.7232(2) 0.7942(2) 0.0192(6) Uani 1 1 d . . .
C7 C -0.5053(6) 0.6144(2) 0.6947(2) 0.0176(6) Uani 1 1 d . . .
C8 C 0.4995(5) -0.0752(2) 0.73154(19) 0.0134(5) Uani 1 1 d . . .
C6 C 0.4258(6) -0.2868(2) 0.6875(2) 0.0172(6) Uani 1 1 d . . .
C5 C 0.5921(5) -0.1816(2) 0.73449(19) 0.0143(6) Uani 1 1 d . . .
C4 C 0.8346(6) -0.1772(3) 0.7862(2) 0.0203(6) Uani 1 1 d . . .
HC1 H -0.026(6) 0.529(3) 0.793(2) 0.017(8) Uiso 1 1 d . . .
HC3 H 0.065(7) 0.729(3) 0.831(2) 0.033(9) Uiso 1 1 d . . .
HC4 H 0.950(6) -0.113(3) 0.816(2) 0.023(9) Uiso 1 1 d . . .
HC6 H 0.262(6) -0.293(3) 0.653(2) 0.025(9) Uiso 1 1 d . . .
HC7 H -0.626(6) 0.546(3) 0.665(2) 0.020(8) Uiso 1 1 d . . .
HC8 H 0.314(6) -0.096(3) 0.709(2) 0.023(8) Uiso 1 1 d . . .
H2 H 1 0.5 1 0.066(19) Uiso 1 2 d S . .
H3 H 0.445(8) 0.593(4) 0.894(3) 0.046(13) Uiso 1 1 d . . .
H4 H -0.110(6) 0.409(3) 0.556(2) 0.019(9) Uiso 1 1 d . . .
H11 H 0.906(8) 0.131(4) 0.890(3) 0.054(13) Uiso 1 1 d . . .
H14A H 1.115(8) 0.313(4) 0.917(3) 0.043(12) Uiso 1 1 d . . .
H14B H 0.895(9) 0.291(4) 0.859(3) 0.063(15) Uiso 1 1 d . . .
H15A H 0.181(8) 0.395(4) 0.456(3) 0.054(14) Uiso 1 1 d . . .
H15B H 0.238(9) 0.349(4) 0.521(3) 0.055(15) Uiso 1 1 d . . .
H16A H 0.515(9) 0.762(4) 1.011(4) 0.054(15) Uiso 1 1 d . . .
H16B H 0.560(10) 0.796(5) 0.940(4) 0.082(19) Uiso 1 1 d . . .
H9 H 0.582(12) -0.105(5) 0.501(3) 0.12(2) Uiso 1 1 d D . .
H13A H -0.061(13) 0.146(6) 0.501(5) 0.09(3) Uiso 1 1 d . . .
H13B H 0.092(16) 0.141(7) 0.488(6) 0.15(4) Uiso 1 1 d . . .
H12 H 0.5 0 1 0.13(3) Uiso 1 2 d S . .
 
loop_
    _atom_site_aniso_label
    _atom_site_aniso_U_11
    _atom_site_aniso_U_22
    _atom_site_aniso_U_33
    _atom_site_aniso_U_23
    _atom_site_aniso_U_13
    _atom_site_aniso_U_12
La1 0.01232(9) 0.00977(9) 0.01335(9) 0.00389(6) 0.00417(6) 0.00410(6)
P1 0.0147(3) 0.0103(3) 0.0128(3) 0.0027(3) 0.0015(3) 0.0029(3)
P2 0.0128(3) 0.0101(3) 0.0135(3) 0.0050(3) 0.0046(3) 0.0047(3)
P3 0.0147(3) 0.0106(3) 0.0163(3) 0.0055(3) 0.0061(3) 0.0045(3)
P4 0.0181(4) 0.0123(3) 0.0155(4) 0.0051(3) 0.0047(3) 0.0052(3)
O1 0.0223(10) 0.0122(10) 0.0143(9) 0.0030(7) 0.0024(8) 0.0022(8)
O2 0.0214(11) 0.0152(10) 0.0147(10) 0.0019(8) -0.0029(8) 0.0049(8)
O3 0.0167(10) 0.0220(12) 0.0201(11) 0.0052(9) 0.0047(8) 0.0063(9)
O4 0.0220(11) 0.0215(11) 0.0207(11) 0.0118(8) 0.0116(9) 0.0109(9)
O5 0.0129(9) 0.0148(10) 0.0138(9) 0.0050(7) 0.0026(7) 0.0036(8)
O6 0.0162(10) 0.0162(10) 0.0196(10) 0.0075(8) 0.0051(8) 0.0089(8)
O7 0.0269(11) 0.0224(11) 0.0387(13) 0.0195(10) 0.0201(10) 0.0166(9)
O8 0.0162(10) 0.0242(11) 0.0315(12) 0.0140(9) 0.0059(9) 0.0008(9)
O9 0.0392(13) 0.0176(11) 0.0153(11) 0.0038(8) 0.0092(10) 0.0043(9)
O10 0.0251(11) 0.0136(10) 0.0174(10) 0.0036(8) 0.0020(8) 0.0088(8)
O11 0.0201(11) 0.0203(12) 0.0242(11) 0.0094(9) 0.0009(9) 0.0024(9)
O12 0.0267(11) 0.0185(11) 0.0174(10) 0.0081(8) 0.0069(9) 0.0027(9)
O13 0.0428(16) 0.0261(13) 0.0166(12) 0.0002(10) 0.0038(12) 0.0028(12)
O14 0.0177(11) 0.0172(11) 0.0152(11) 0.0019(9) 0.0024(9) 0.0062(9)
O15 0.0193(12) 0.0391(14) 0.0217(12) 0.0165(10) 0.0052(10) 0.0081(10)
O16 0.067(2) 0.0275(15) 0.0247(15) 0.0007(11) 0.0119(14) 0.0191(14)
C1 0.0114(13) 0.0111(13) 0.0160(13) 0.0037(10) 0.0009(11) 0.0027(11)
C2 0.0157(13) 0.0102(13) 0.0163(13) 0.0055(10) 0.0064(11) 0.0046(11)
C3 0.0146(14) 0.0153(15) 0.0268(16) 0.0066(12) 0.0029(13) 0.0038(12)
C7 0.0184(14) 0.0110(14) 0.0192(14) 0.0028(11) -0.0017(12) 0.0028(12)
C8 0.0135(14) 0.0107(13) 0.0177(14) 0.0054(10) 0.0064(11) 0.0029(11)
C6 0.0173(15) 0.0137(14) 0.0184(14) 0.0029(11) 0.0015(12) 0.0049(11)
C5 0.0169(14) 0.0124(13) 0.0167(14) 0.0056(10) 0.0074(11) 0.0065(11)
C4 0.0162(14) 0.0100(14) 0.0323(17) 0.0064(12) 0.0032(13) -0.0004(12)
 
 
#----------------------------------------------------------------------------#
#                   MOLECULAR GEOMETRY                                       #
#----------------------------------------------------------------------------#
 
_geom_special_details
;
 All esds (except the esd in the dihedral angle between two l.s. planes)
 are estimated using the full covariance matrix.  The cell esds are taken
 into account individually in the estimation of esds in distances, angles
 and torsion angles; correlations between esds in cell parameters are only
 used when they are defined by crystal symmetry.  An approximate (isotropic)
 treatment of cell esds is used for estimating esds involving l.s. planes.
;
loop_
    _geom_bond_atom_site_label_1
    _geom_bond_atom_site_label_2
    _geom_bond_distance
    _geom_bond_site_symmetry_2
    _geom_bond_publ_flag
La1 O6 2.4165(18) . ?
La1 O7 2.4502(19) . ?
La1 O8 2.454(2) 1_455 ?
La1 O5 2.5024(18) 1_655 ?
La1 O10 2.5103(19) . ?
La1 O1 2.5237(19) . ?
La1 O14 2.647(2) 1_455 ?
La1 O13 2.661(3) . ?
P1 O1 1.507(2) . ?
P1 O2 1.5235(19) . ?
P1 O3 1.560(2) . ?
P1 C1 1.829(3) 1_655 ?
P2 O6 1.5016(19) . ?
P2 O5 1.5125(19) . ?
P2 O4 1.572(2) . ?
P2 C1 1.818(3) . ?
P3 O8 1.492(2) . ?
P3 O7 1.509(2) . ?
P3 O9 1.575(2) . ?
P3 C8 1.815(3) . ?
P4 O10 1.501(2) . ?
P4 O12 1.518(2) . ?
P4 O11 1.562(2) . ?
P4 C8 1.810(3) . ?
O2 H2 1.2084(19) . ?
O3 H3 0.79(4) . ?
O4 H4 0.75(3) . ?
O5 La1 2.5024(18) 1_455 ?
O8 La1 2.454(2) 1_655 ?
O9 H9 0.819(5) . ?
O11 H11 0.86(4) . ?
O12 H12 1.2119(19) . ?
O13 H13A 0.63(6) . ?
O13 H13B 0.79(9) . ?
O14 La1 2.647(2) 1_655 ?
O14 H14A 0.80(4) . ?
O14 H14B 0.85(5) . ?
O15 H15A 0.79(5) . ?
O15 H15B 0.76(5) . ?
O16 H16A 0.72(5) . ?
O16 H16B 0.84(6) . ?
C1 C2 1.520(4) . ?
C1 P1 1.829(3) 1_455 ?
C1 HC1 0.91(3) . ?
C2 C3 1.384(4) . ?
C2 C7 1.392(4) . ?
C3 C4 1.394(4) 1_465 ?
C3 HC3 0.93(4) . ?
C7 C6 1.382(4) 1_465 ?
C7 HC7 0.93(3) . ?
C8 C5 1.516(4) . ?
C8 HC8 0.98(3) . ?
C6 C7 1.382(4) 1_645 ?
C6 C5 1.384(4) . ?
C6 HC6 0.93(3) . ?
C5 C4 1.391(4) . ?
C4 C3 1.394(4) 1_645 ?
C4 HC4 0.88(3) . ?
 
loop_
    _geom_angle_atom_site_label_1
    _geom_angle_atom_site_label_2
    _geom_angle_atom_site_label_3
    _geom_angle
    _geom_angle_site_symmetry_1
    _geom_angle_site_symmetry_3
    _geom_angle_publ_flag
O6 La1 O7 140.84(7) . . ?
O6 La1 O8 91.58(7) . 1_455 ?
O7 La1 O8 85.05(7) . 1_455 ?
O6 La1 O5 79.89(6) . 1_655 ?
O7 La1 O5 79.25(6) . 1_655 ?
O8 La1 O5 142.08(6) 1_455 1_655 ?
O6 La1 O10 143.43(6) . . ?
O7 La1 O10 74.19(6) . . ?
O8 La1 O10 79.60(7) 1_455 . ?
O5 La1 O10 127.37(6) 1_655 . ?
O6 La1 O1 103.68(6) . . ?
O7 La1 O1 100.35(7) . . ?
O8 La1 O1 146.25(6) 1_455 . ?
O5 La1 O1 71.11(6) 1_655 . ?
O10 La1 O1 70.17(6) . . ?
O6 La1 O14 70.79(7) . 1_455 ?
O7 La1 O14 145.35(7) . 1_455 ?
O8 La1 O14 79.26(7) 1_455 1_455 ?
O5 La1 O14 130.19(6) 1_655 1_455 ?
O10 La1 O14 72.70(6) . 1_455 ?
O1 La1 O14 77.75(7) . 1_455 ?
O6 La1 O13 72.34(9) . . ?
O7 La1 O13 69.85(9) . . ?
O8 La1 O13 70.14(8) 1_455 . ?
O5 La1 O13 72.06(7) 1_655 . ?
O10 La1 O13 134.26(8) . . ?
O1 La1 O13 143.07(8) . . ?
O14 La1 O13 130.66(9) 1_455 . ?
O1 P1 O2 114.89(11) . . ?
O1 P1 O3 108.24(12) . . ?
O2 P1 O3 108.34(11) . . ?
O1 P1 C1 109.33(11) . 1_655 ?
O2 P1 C1 107.42(12) . 1_655 ?
O3 P1 C1 108.45(12) . 1_655 ?
O6 P2 O5 115.14(11) . . ?
O6 P2 O4 110.94(11) . . ?
O5 P2 O4 108.47(11) . . ?
O6 P2 C1 108.56(12) . . ?
O5 P2 C1 108.98(12) . . ?
O4 P2 C1 104.17(12) . . ?
O8 P3 O7 115.23(12) . . ?
O8 P3 O9 111.16(13) . . ?
O7 P3 O9 108.51(13) . . ?
O8 P3 C8 110.65(12) . . ?
O7 P3 C8 108.93(12) . . ?
O9 P3 C8 101.44(12) . . ?
O10 P4 O12 116.65(12) . . ?
O10 P4 O11 110.95(12) . . ?
O12 P4 O11 105.82(12) . . ?
O10 P4 C8 108.57(12) . . ?
O12 P4 C8 105.03(12) . . ?
O11 P4 C8 109.53(12) . . ?
P1 O1 La1 129.56(11) . . ?
P1 O2 H2 119.60(14) . . ?
P1 O3 H3 113(3) . . ?
P2 O4 H4 110(3) . . ?
P2 O5 La1 128.82(10) . 1_455 ?
P2 O6 La1 176.65(12) . . ?
P3 O7 La1 141.75(12) . . ?
P3 O8 La1 142.04(12) . 1_655 ?
P3 O9 H9 119(5) . . ?
P4 O10 La1 143.32(11) . . ?
P4 O11 H11 114(3) . . ?
P4 O12 H12 117.49(14) . . ?
La1 O13 H13A 127(6) . . ?
La1 O13 H13B 119(6) . . ?
H13A O13 H13B 78(7) . . ?
La1 O14 H14A 118(3) 1_655 . ?
La1 O14 H14B 116(3) 1_655 . ?
H14A O14 H14B 101(4) . . ?
H15A O15 H15B 108(4) . . ?
H16A O16 H16B 109(5) . . ?
C2 C1 P2 116.43(19) . . ?
C2 C1 P1 110.54(18) . 1_455 ?
P2 C1 P1 111.67(14) . 1_455 ?
C2 C1 HC1 108.4(19) . . ?
P2 C1 HC1 104.2(19) . . ?
P1 C1 HC1 104.7(19) 1_455 . ?
C3 C2 C7 118.5(3) . . ?
C3 C2 C1 119.7(2) . . ?
C7 C2 C1 121.6(2) . . ?
C2 C3 C4 120.8(3) . 1_465 ?
C2 C3 HC3 121(2) . . ?
C4 C3 HC3 119(2) 1_465 . ?
C6 C7 C2 120.7(3) 1_465 . ?
C6 C7 HC7 118(2) 1_465 . ?
C2 C7 HC7 120.9(19) . . ?
C5 C8 P4 113.31(19) . . ?
C5 C8 P3 113.95(18) . . ?
P4 C8 P3 112.23(14) . . ?
C5 C8 HC8 108.9(19) . . ?
P4 C8 HC8 101.2(18) . . ?
P3 C8 HC8 106.2(18) . . ?
C7 C6 C5 121.0(3) 1_645 . ?
C7 C6 HC6 118(2) 1_645 . ?
C5 C6 HC6 121(2) . . ?
C6 C5 C4 118.6(3) . . ?
C6 C5 C8 118.9(2) . . ?
C4 C5 C8 122.4(3) . . ?
C5 C4 C3 120.3(3) . 1_645 ?
C5 C4 HC4 123(2) . . ?
C3 C4 HC4 117(2) 1_645 . ?
 
loop_
    _geom_hbond_atom_site_label_D
    _geom_hbond_atom_site_label_H
    _geom_hbond_atom_site_label_A
    _geom_hbond_distance_DH
    _geom_hbond_distance_HA
    _geom_hbond_distance_DA
    _geom_hbond_angle_DHA
    _geom_hbond_site_symmetry_A
O2 H2 O2 1.2084(19) 1.2084(19) 2.417(4) 180.000(2) 2_767
O3 H3 O16 0.79(4) 1.79(4) 2.577(3) 179(4) .
O4 H4 O15 0.75(3) 1.88(3) 2.618(3) 170(4) .
O11 H11 O14 0.86(4) 1.84(4) 2.699(3) 174(4) .
O14 H14A O2 0.80(4) 2.06(4) 2.781(3) 149(4) 2_767
O14 H14B O1 0.85(5) 1.95(5) 2.808(3) 178(4) .
O15 H15A O4 0.79(5) 2.31(5) 2.998(3) 146(4) 2_566
O15 H15B O5 0.76(5) 1.98(5) 2.724(3) 164(5) 1_655
O16 H16A O10 0.72(5) 2.18(5) 2.869(3) 161(5) 2_667
O16 H16B O12 0.84(6) 2.36(6) 3.069(4) 142(5) 1_565
O9 H9 O7 0.819(5) 2.07(3) 2.837(3) 156(6) 2_656
O9 H9 O13 0.819(5) 2.36(6) 2.872(4) 121(5) 2_656
O13 H13A O9 0.63(6) 2.53(7) 3.009(4) 135(7) 2_556
O13 H13B O9 0.79(9) 2.25(8) 2.872(4) 136(8) 2_656
O12 H12 O12 1.2119(19) 1.2119(19) 2.424(4) 180.0000(10) 2_657
 
